# Supplementary material for: Spleen‐Kidney Supplementing Formula Alleviates Renal Fibrosis in Diabetic Rats via TGF‐β1‐miR‐21‐PTEN Signaling Pathway
Source: Hindawi journal article supplement (doi:10.1155/2018/3824357), 2018-01-01
Supplement: f1 [file 3824357.f1.pdf]

# Spleen-kidney Supplementing Formula Alleviates Renal Fibrosis in Diabetic Rats via TGF- $\beta$ 1- miR-21-PTEN signaling pathway

Chunyu Tian<sup>1\*#</sup>, Ya Wang<sup>1#</sup>, Hong Chang<sup>1#</sup>, Ji'an Li<sup>1</sup>, Xiaojin La<sup>1</sup>

1. Traditional Chinese Medical College, North China University of Science and Technology, Tangshan 063210, China

Correspondence should be addressed to Chunyu Tian, tcy4479@sina.com.

#: These authors contributed to the paper equally.

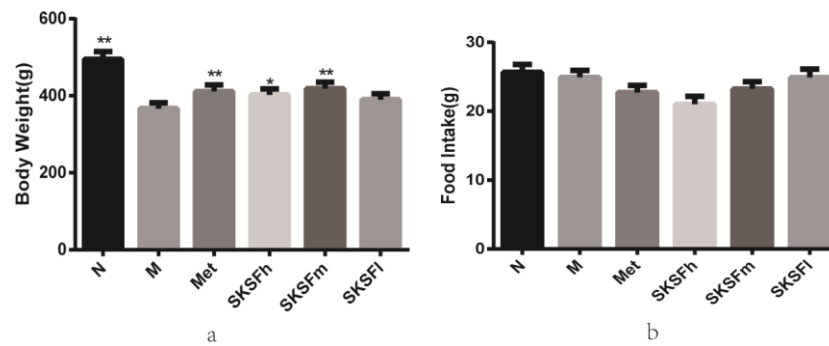

Supplement 1: The effect of SKSF on body weight and food intake. a Body weight, b Food intake. Data were expressed as mean  $\pm$  SD, n=10 rats per group. N, normal group; M, model group; Met, metformin group; SKSF-l, Spleen-kidney Supplementing Formula group at a low dose; SKSF-m, Spleen-kidney Supplementing Formula group at a medium dose; SKSF-h, Spleen-kidney Supplementing Formula group at a high dose. \*  $P < 0.05$  compared with model group.
